# Supplementary material for: Comparative kinetic analysis of two fungal β-glucosidases
Source: Springer Nature journal article supplement (doi:10.1186/1754-6834-3-3), 2010-02-11

| <b>A</b> | <b>Step</b>      | <b>Total activity<br/>(U/mL)</b> | <b>[Proteins]<br/>(mg/mL)</b> | <b>Purity yield<br/>(%)</b> | <b>Specific activity<br/>(U/mg)</b> | <b>Purification<br/>factor</b> |
|----------|------------------|----------------------------------|-------------------------------|-----------------------------|-------------------------------------|--------------------------------|
|          | <i>Secretome</i> | 51460                            | 2.5                           | 2                           | 20606                               | 1                              |
|          | Avicel fixation  | 43863                            | 0.2                           | 60                          | 190709                              | 9                              |
|          | Anion exchange   | 131573                           | 0.1                           | 95                          | 1096438                             | 53                             |

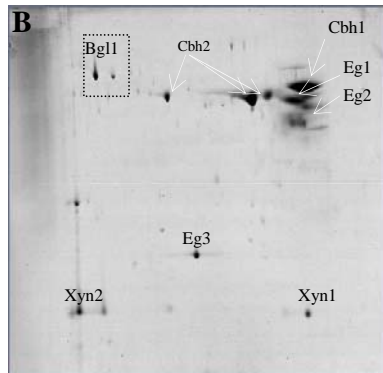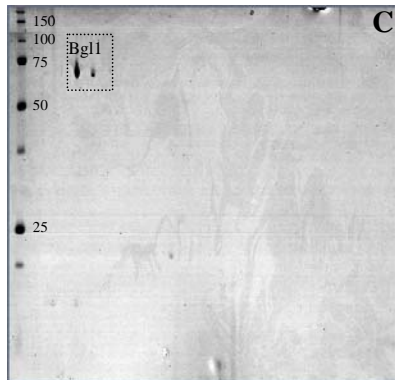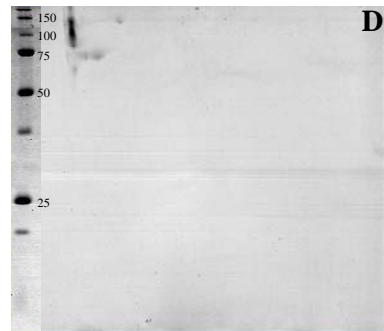

Supplement: 13068_2009_52_MOESM1_ESM.pdf [file 13068_2009_52_MOESM1_ESM.pdf]
