# Supplementary material for: Comparative kinetic analysis of two fungal β-glucosidases
Source: Springer Nature journal article supplement (doi:10.1186/1754-6834-3-3), 2010-02-11

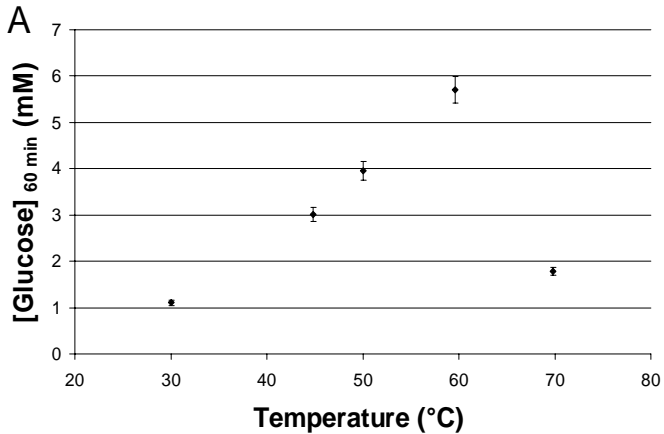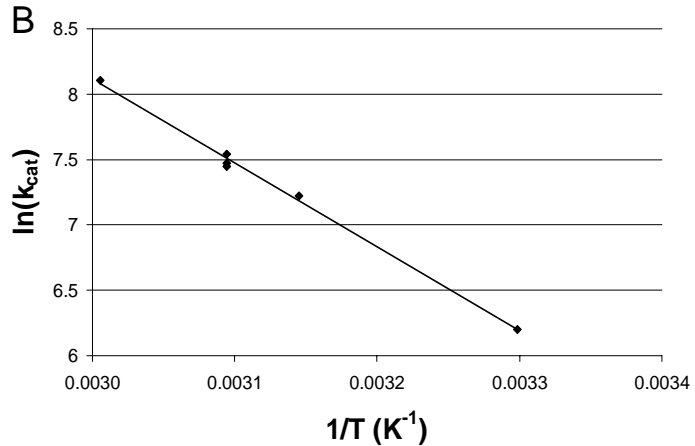

Supplement: 13068_2009_52_MOESM3_ESM.pdf [file 13068_2009_52_MOESM3_ESM.pdf]
